# Supplementary material
Source: PubMed Central journal article supplement (PMC5741419)
Supplement: supp_5.4.E814_2017-0112-1-at.pdf [file supp_5.4.E814_2017-0112-1-at.pdf]

## Appendix 1 (as supplied by the authors): Search strategy and full quality assessment

### Passive marijuana smoke and health impacts and harms search strategy

#### MEDLINE (882 abstracts)

1. Cannabis/ae, de, pd, po, to [Adverse Effects, Drug Effects, Pharmacology, Poisoning, Toxicity]
2. exp Marijuana Abuse/
3. 1 or 2
4. Tobacco Smoke Pollution/
5. exp Environmental Exposure/
6. (exposure or exposed or involuntary or passive or second hand or secondhand or thirdhand or third hand).tw,kw.
7. 4 or 5 or 6
8. 3 and 7
9. ((bhang or bhangs or bhangstar or cannabutter or cannabis\* or doobie\* or ganga or gangas or ganja or ganjas or grass or hash\* or hashish\* or hemp or hemsps or honeycomb or mary jane\* or marihuana\* or marijuana\* or moon rock or pot or reefer\* or roach\* or shatter or weed) adj3 (exposure or exposed or involuntary or passive or second hand or secondhand or thirdhand or third hand)).tw.
10. (addicted or addiction or adverse event\* or adverse reaction\* or behavioral or behavioural or birth defect\* or blood pressure or cancer\* or cogniti\* or death\* or dependenc\* or developmental or (drug\* adj3 interact\*) or effect or effects or fetal or faetal or harm or harms or impact or impacts or impair\* or lung or lungs or morbidit\* or mortalit\* or negative drug test\* or oral fluid test\* or outcome or outcomes or poison\* or positive drug test\* or psycho\* or pulmonary or respiratory or risks or safety or (saliva adj3 (level\* or test\*)) or (urine adj3 (level\* or test\*)) or toxic\*).tw.
11. 9 and 10
12. 8 or 11
13. limit 12 to (english or french)
14. limit 13 to (case reports or comment or editorial or letter)
15. 13 not 14
16. limit 15 to "review"
17. 15 not 16
18. limit 17 to (meta analysis or systematic reviews)
19. ((systematic or critical or scoping) adj3 (overview\* or review\* or synthesis)).tw.
20. 15 and 19
21. 17 or 18 or 20

Supplementary Table 1: Full Quality Assessment, using Downs and Blacks Checklist<sup>1</sup>

| Author             | Question |   |   |   |   |   |   |   |   |    |    |    |    |    |    |    |    |    |    |    |    |    |    |    |    |    |    | Total |
|--------------------|----------|---|---|---|---|---|---|---|---|----|----|----|----|----|----|----|----|----|----|----|----|----|----|----|----|----|----|-------|
|                    | 1        | 2 | 3 | 4 | 5 | 6 | 7 | 8 | 9 | 10 | 11 | 12 | 13 | 14 | 15 | 16 | 17 | 18 | 19 | 20 | 21 | 22 | 23 | 24 | 25 | 26 | 27 |       |
| Cone et al.        | 1        | 1 | 1 | 1 | 1 | 1 | 1 | 1 | 1 | 0  | 0  | 0  | 0  | 0  | 1  | 1  | 1  | 1  | 1  | 1  | 1  | 0  | 0  | 0  | 1  | 1  | 5  | 22    |
| Cone et al.        | 1        | 1 | 1 | 1 | 1 | 1 | 1 | 1 | 1 | 0  | 0  | 0  | 0  | 0  | 1  | 1  | 1  | 1  | 1  | 1  | 1  | 0  | 0  | 0  | 1  | 1  | 5  | 22    |
| Cone et al.        | 1        | 1 | 1 | 1 | 1 | 1 | 0 | 1 | 1 | 0  | 0  | 0  | 1  | 1  | 1  | 1  | 1  | 1  | 1  | 1  | 0  | 0  | 0  | 0  | 1  | 1  | 5  | 22    |
| Cone et al.        | 1        | 1 | 0 | 1 | 0 | 1 | 0 | 1 | 1 | 0  | 0  | 0  | 1  | 1  | 1  | 1  | 1  | 1  | 1  | 1  | 0  | 0  | 0  | 0  | 1  | 1  | 4  | 19    |
| Cone et al.        | 1        | 1 | 1 | 1 | 0 | 1 | 0 | 1 | 1 | 0  | 0  | 0  | 1  | 1  | 1  | 1  | 1  | 1  | 1  | 1  | 0  | 0  | 0  | 0  | 1  | 1  | 4  | 20    |
| Herrmann et al.    | 1        | 1 | 1 | 1 | 2 | 1 | 0 | 1 | 1 | 1  | 0  | 0  | 0  | 0  | 1  | 1  | 1  | 1  | 1  | 1  | 0  | 0  | 0  | 0  | 1  | 1  | 5  | 22    |
| Law et al.         | 0        | 1 | 0 | 1 | 0 | 1 | 0 | 1 | 1 | 0  | 0  | 0  | 0  | 0  | 1  | 1  | 1  | 1  | 1  | 1  | 0  | 0  | 0  | 0  | 0  | 1  | 2  | 13    |
| Niedbala et al.    | 1        | 1 | 1 | 1 | 0 | 1 | 1 | 1 | 1 | 0  | 0  | 0  | 0  | 0  | 1  | 0  | 1  | 1  | 1  | 1  | 0  | 0  | 0  | 0  | 1  | 1  | 2  | 16    |
| Moore et al.       | 1        | 1 | 1 | 1 | 0 | 1 | 0 | 1 | 1 | 0  | 0  | 0  | 0  | 0  | 1  | 1  | 1  | 1  | 1  | 1  | 0  | 0  | 0  | 0  | 1  | 1  | 5  | 19    |
| Morland et al.     | 1        | 1 | 0 | 1 | 0 | 1 | 0 | 1 | 1 | 0  | 0  | 0  | 0  | 0  | 1  | 1  | 1  | 1  | 1  | 1  | 0  | 0  | 0  | 0  | 1  | 1  | 3  | 16    |
| Mule et al.        | 1        | 1 | 0 | 1 | 1 | 1 | 0 | 1 | 1 | 1  | 0  | 0  | 0  | 0  | 1  | 1  | 1  | 1  | 1  | 1  | 0  | 0  | 0  | 0  | 1  | 0  | 4  | 18    |
| Niedbala et al.    | 1        | 1 | 1 | 1 | 0 | 1 | 0 | 1 | 1 | 0  | 0  | 0  | 0  | 0  | 1  | 0  | 1  | 1  | 1  | 1  | 0  | 0  | 0  | 0  | 1  | 1  | 2  | 15    |
| Perez-Reyes et al. | 1        | 1 | 0 | 1 | 0 | 1 | 1 | 0 | 1 | 0  | 0  | 0  | 0  | 0  | 1  | 1  | 1  | 1  | 1  | 1  | 0  | 0  | 0  | 0  | 1  | 1  | 3  | 16    |
| Rohrich et al.     | 1        | 1 | 0 | 1 | 0 | 1 | 0 | 0 | 1 | 0  | 0  | 0  | 0  | 0  | 1  | 1  | 1  | 1  | 1  | 1  | 0  | 0  | 0  | 0  | 0  | 1  | 4  | 15    |
| Zeidenberg et al.  | 1        | 1 | 0 | 1 | 0 | 1 | 0 | 1 | 1 | 0  | 0  | 0  | 0  | 0  | 0  | 1  | 1  | 1  | 1  | 1  | 0  | 0  | 0  | 1  | 1  | 1  | 1  | 14    |

N/A: Not applicable

Reference

- Downs SH, Black N. The feasibility of creating a checklist for the assessment of the methodological quality both of randomised and non-randomised studies of health care interventions. *J Epidemiol Community Health*. 1998;52(6):377-384.
